# Supplementary material for: Divergent downstream biosynthetic pathways are supported by L-cysteine synthases of Mycobacterium tuberculosis
Source: eLife journal article supplement (doi:10.7554/elife.91970), 2023-12-04

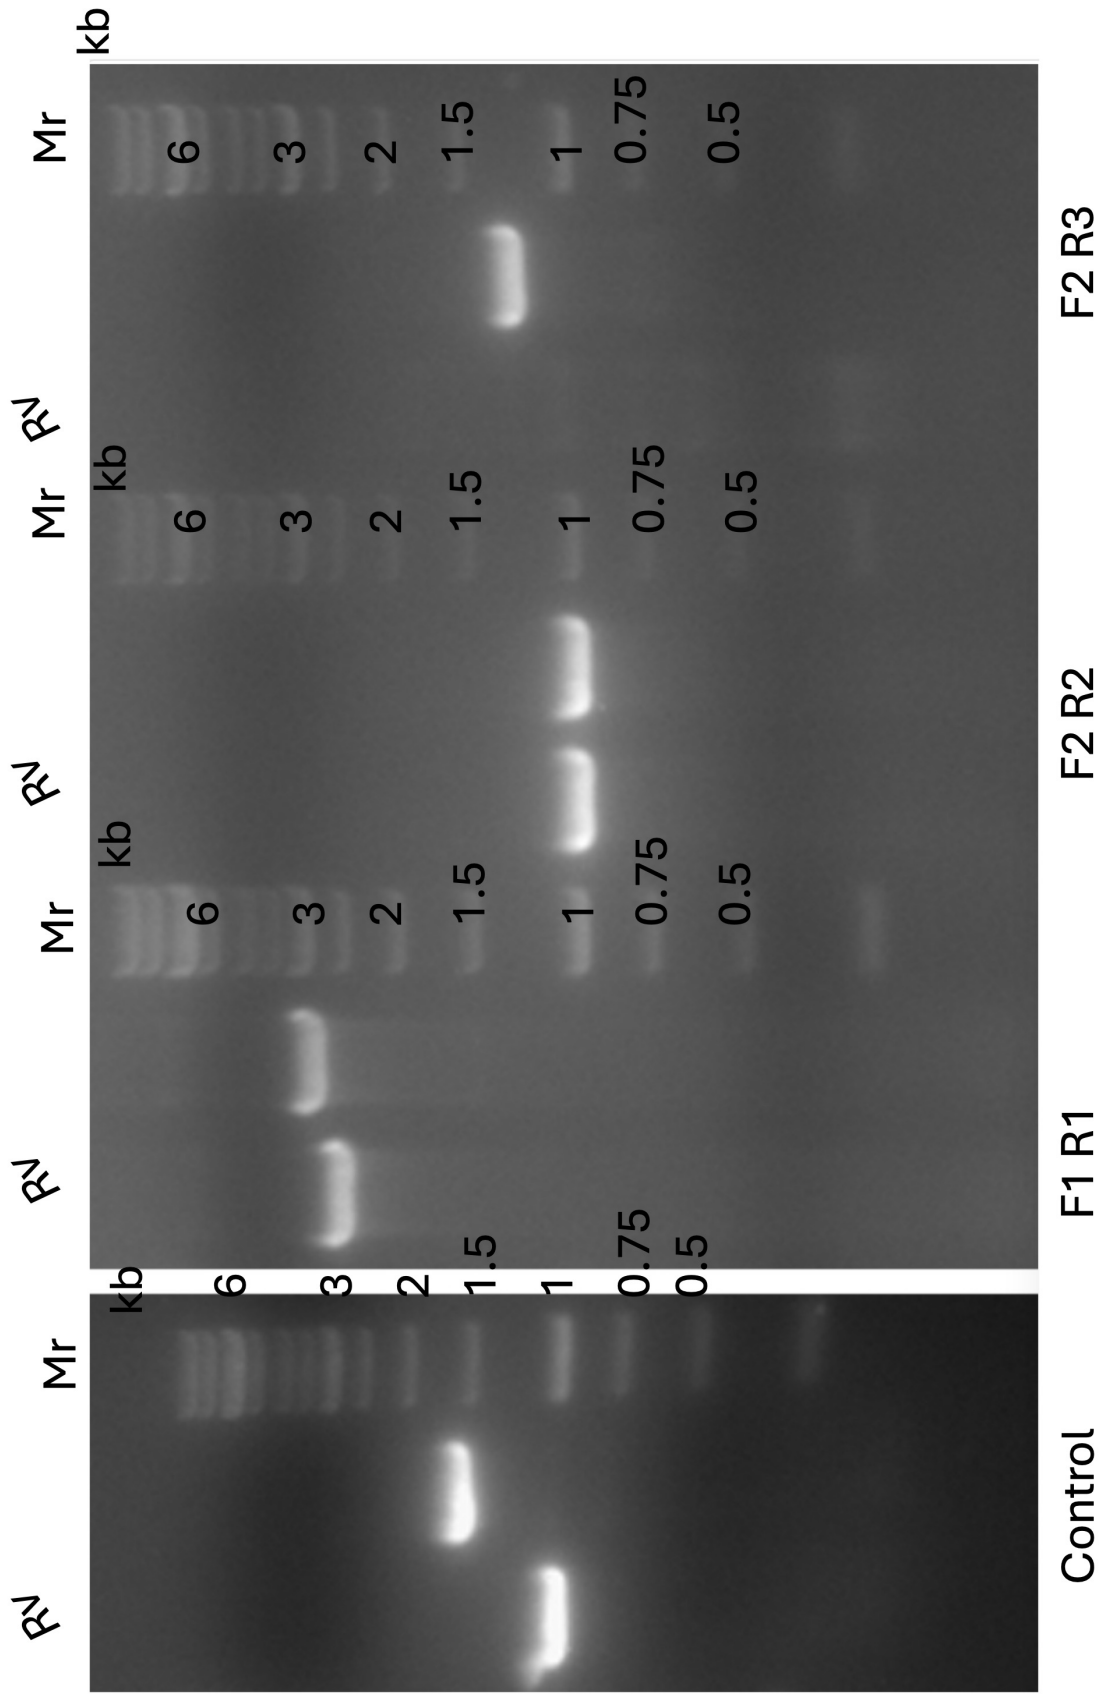

Supplement: fig1-data3 [file elife-91970-fig1-data3-v1.pdf]
