# Supplementary material for: Divergent downstream biosynthetic pathways are supported by L-cysteine synthases of Mycobacterium tuberculosis
Source: eLife journal article supplement (doi:10.7554/elife.91970), 2023-12-04
Supplement: fig6-data2 [file elife-91970-fig6-data2-v1.pdf]

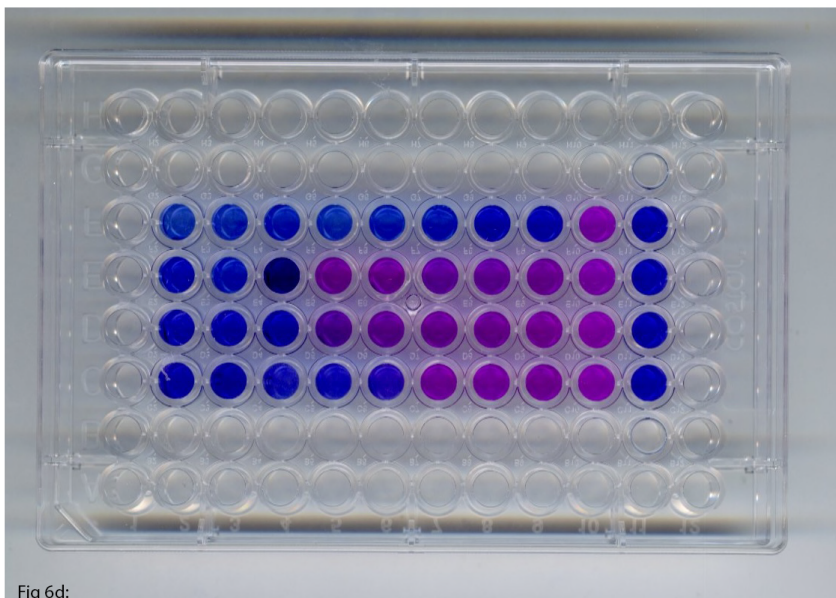

Fig 6d:

Row 1. INH only  
 Row 2. C1 Only  
 Row 3: MIC of C1+ serial 2-fold dilution of INH from MIC  
 Row 4: MIC of INH + serial 2-fold dilution of C1 from MIC

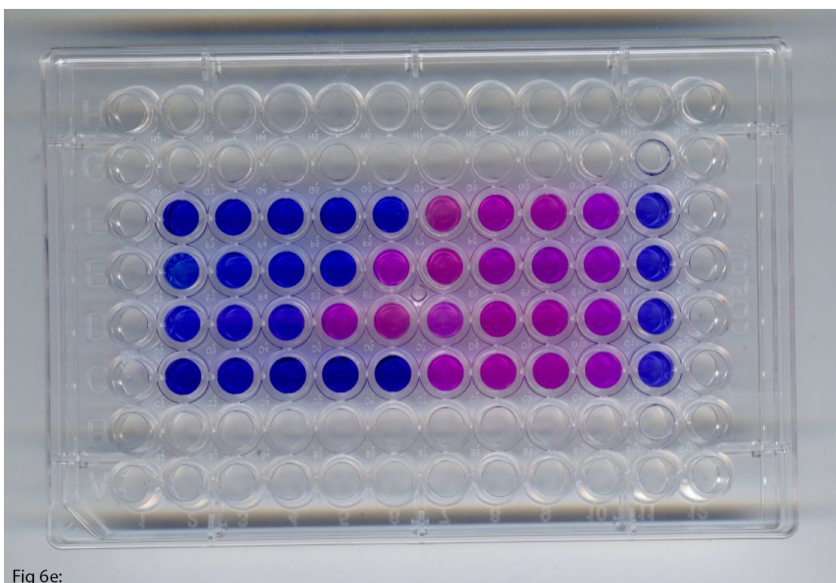

Fig 6e:

Row 1. INH only  
 Row 2. C2 Only  
 Row 3: MIC of C2+ serial 2-fold dilution of INH from MIC  
 Row 4: MIC of INH + serial 2-fold dilution of C2 from MIC

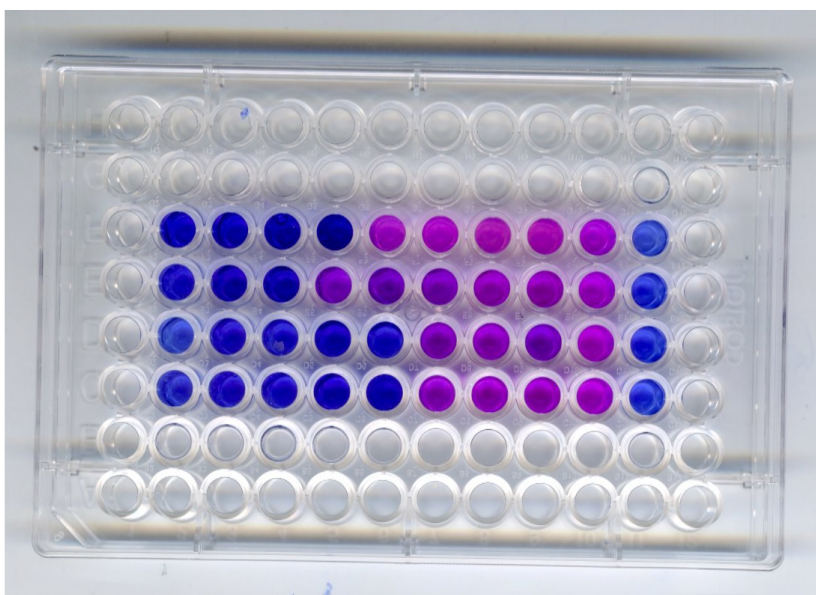

Fig 6f:

Row 1. INH only  
 Row 2. Compound C3  
 Row 3: MIC of C3 + serial 2-fold dilution of INH from MIC  
 Row 4: MIC of INH + serial 2-fold dilution of C3 from MIC
