# Supplementary material for: Divergent downstream biosynthetic pathways are supported by L-cysteine synthases of Mycobacterium tuberculosis
Source: eLife. 2024 Aug 29;12:RP91970. doi: 10.7554/eLife.91970 (PMC11361707; doi:10.7554/eLife.91970)
Supplement: Figure 1—figure supplement 5—source data 1. [file elife-91970-fig1-figsupp5-data1.xlsx]

## Sheet: Sheet1
	Figure 1: figure supplement 5a-Source Data 1
	Figure 1: figure supplement 5a. Source Data: Growth of Rv, RvΔcysM, RvΔcysK2, RvΔcysM::cysM, and RvΔcysK2::cysK2 strains in 7H9-ADC media
		Rv			RvΔcysM			RvΔcysM::cysM			RvΔcysK2			RvΔcysK2::cysK2
	Day 0	13000000	13000000	6900000	10200000	14000000	14000000	12000000	14000000	13200000	14000000	12000000	10000000	10000000	13000000	12000000
	Day 3	65000000	63000000	54500000	61000000	50000000	50000000	70000000	80000000	86000000	60000000	53000000	80000000	70000000	72000000	71000000
	Day 6	320000000	320000000	270000000	250000000	250000000	250000000	300000000	350000000	300000000	250000000	300000000	350000000	350000000	350000000	330000000
	Figure 1: figure supplement 5-Source Data 1: Growth of Rv, RvΔcysM, RvΔcysK2, RvΔcysM::cysM, and RvΔcysK2::cysK2 strains in 7H9-ADS media
		Rv			RvΔcysM			RvΔcysM::cysM			RvΔcysK2			RvΔcysK2::cysK2
	Day 0	8000000	7800000	4100000	7200000	8300000	8800000	5400000	8000000	8100000	6900000	8000000	7400000	7200000	7800000	7200000
	Day 3	41500000	44000000	27000000	43000000	40000000	39000000	20500000	43000000	40000000	40500000	40000000	29000000	31000000	31000000	33000000
	Day 6	230000000	135000000	215000000	200000000	200000000	195000000	102500000	225000000	220000000	207000000	230000000	235000000	215000000	215000000	245000000
	Figure 1: figure supplement 5c.Source Data: Effect of diamide on growth of Rv, RvΔcysM, RvΔcysK2, RvΔcysM::cysM, and RvΔcysK2::cysK2 strains
		Rv			RvΔcysM			RvΔcysM::cysM			RvΔcysK2			RvΔcysK2::cysK2
	Diamide	10000000	10500000	9600000	200000	400000	800000	6900000	8000000	5000000	640000	600000	400000	10000000	10000000	10800000
