# Supplementary material for: Divergent downstream biosynthetic pathways are supported by L-cysteine synthases of Mycobacterium tuberculosis
Source: eLife. 2024 Aug 29;12:RP91970. doi: 10.7554/eLife.91970 (PMC11361707; doi:10.7554/eLife.91970)
Supplement: Figure 1—source data 1. [file elife-91970-fig1-data1.xlsx]

## Sheet: Sheet1
Figure 1-Source Data 1
Figure 1c. Source Data-Growth of Rv, RvΔcysM, RvΔcysK2, RvΔcysM::cysM, and RvΔcysK2::cysK2 strains in Sauton’s media
	Rv			RvΔcysM			RvΔcysM::cysM			RvΔcysK2			RvΔcysK2::cysK2
Day 0	18000000	18000000	9900000	10500000	14000000	14000000	12000000	14000000	13200000	16000000	15300000	15300000	15600000	17300000	17300000
Day 3	65000000	63000000	54500000	6100000	4000000	5000000	70000000	80000000	86000000	6000000	5300000	8000000	70000000	72000000	71000000
Day 6	380000000	420000000	370000000	2500000	5500000	5500000	380000000	350000000	390000000	2500000	3000000	2500000	370000000	340000000	340000000
Figure 1d. Source Data-Growth of Rv, RvΔcysM, RvΔcysK2, RvΔcysM::cysM, and RvΔcysK2::cysK2 strains in PBS
	Rv			RvΔcysM			RvΔcysM::cysM			RvΔcysK2			RvΔcysK2::cysK2
PBS	9750000	7250000	8250000	1620000	1750000	1620000	8120000	8500000	7620000	1800000	1550000	1250000	8500000	8500000	7250000
Figure 1e. Source Data-Growth of Rv, RvΔcysM, RvΔcysK2, RvΔcysM::cysM, and RvΔcysK2::cysK2 strains in Acidic pH media
	Rv			RvΔcysM			RvΔcysM::cysM			RvΔcysK2			RvΔcysK2::cysK2
Acidic pH	730000	690000	690000	100000	120000	100000	700000	600000	720000	420000	420000	370000	600000	800000	600000
Figure 1f. Source Data- Effect of CHP on growth of Rv, RvΔcysM, RvΔcysK2, RvΔcysM::cysM, and RvΔcysK2::cysK2 strains
	Rv			RvΔcysM			RvΔcysM::cysM			RvΔcysK2			RvΔcysK2::cysK2
CHP	3500000	7200000	5500000	55000	50000	42000	3800000	3600000	5000000	140000	500000	152000	7600000	6000000	7200000
Figure 1g. Source Data-Growth of Rv, RvΔcysM, RvΔcysK2, RvΔcysM::cysM, and RvΔcysK2::cysK2 strains in Nitrosative
	Rv			RvΔcysM			RvΔcysM::cysM			RvΔcysK2			RvΔcysK2::cysK2
Nitrosative stress	8000000	8200000	7100000	920000	830000	980000	6400000	7000000	7000000	1020000	1100000	1100000	8200000	6000000	8200000
Figure 1h. Source Data-Growth of Rv, RvΔcysM, RvΔcysK2, RvΔcysM::cysM, and RvΔcysK2::cysK2 strains in DTT
	Rv			RvΔcysM			RvΔcysM::cysM			RvΔcysK2			RvΔcysK2::cysK2
DTT	5300000	4200000	5000000	5000000	4000000	5200000	5900000	4000000	5000000	4400000	5000000	3500000	3600000	6000000	3200000
Figure 1i. Source Data-Growth of Rv, RvΔcysM, RvΔcysK2, RvΔcysM::cysM, and RvΔcysK2::cysK2 strains in DTT
	Rv			RvΔcysM			RvΔcysM::cysM			RvΔcysK2			RvΔcysK2::cysK2
SDS	3000000	3200000	3000000	4000000	2700000	3200000	3200000	3200000	2900000	3100000	2500000	4300000	2700000	3000000	2900000
