# Supplementary material for: Divergent downstream biosynthetic pathways are supported by L-cysteine synthases of Mycobacterium tuberculosis
Source: eLife. 2024 Aug 29;12:RP91970. doi: 10.7554/eLife.91970 (PMC11361707; doi:10.7554/eLife.91970)
Supplement: Figure 3—source data 1. [file elife-91970-fig3-data1.xlsx]

## Sheet: Sheet1
	Figure 3-Source Data 1
	Figure 3a. Source Data: Total abundance (Ion count/Protein concentration) of L-methionine in Rv, RvΔcysM and RvΔcysK2
		Rv			RvΔcysK2			RvΔcysM
	0	39363.7	38470.7	39645.1	38504.8	38900	38007.8	66808.3	73053.1	63403.5
	24	63723.6	59363.6	61463.5	42989.4	45288.5	41831.4	86279.4	72655.9	71697.4
	24 plus CHP	18419.6	19379.1	17686.2	32195.2	43815.8	32320.5	97280.6	90516.5	93529.7
	Figure 3b. Source Data: Total abundance (Ion count/Protein concentration) of Ergothioneine in Rv, RvΔcysM and RvΔcysK2
		Rv			RvΔcysK2			RvDcysM
	0	222154	233845	217342	165904	166317	178771	146017	184800	141158
	24	158824	150936	170541	159508	178681	144078	151199	153632	160532
	24 plus CHP	88732.7	114435	80680.9	132198	160601	166676	218644	162477	197509
	Figure 3c. Source Data: Total abundance (Ion count/Protein concentration) of Mycothiol in Rv, RvΔcysM and RvΔcysK2
		Rv			RvΔcysK2			RvΔcysM
	0	173148	181235	176187	298354	283969	257398	110295	124392	143744
	24	184232	229268	202304	270956	287321	271361	153846	146204	149587
	24 plus CHP	372043	403505	410906	322399	323170	337540	130134	169413	210378
	Figure 3d. Source Data: Total abundance (Ion count/Protein concentration) of Mycothione in Rv, RvΔcysM and RvΔcysK2
		Rv			RvΔcysK2			RvΔcysM
	0	10403.8	10279.3	10481.9	13563.1	14744.4	15384.7	9390.58	10454.4	5830.99
	24	11153.9	10666.3	11289.9	18917.9	17571.7	16014.7	15943.9	16466.7	13379.9
	24 plus CHP	12460.9	11231.5	11887.5	14467.3	13742.2	14422.7	17074.7	14976.4	17573.2
	Fgiure 3e. Source Data: Percentage of ergothioneine labelling in Rv, RvΔcysM and RvΔcysK2 with or without CHP treatment
		Unlabelled			Labelled
	Rv- 48 h	81.5703	82.3764	82.1638	18.4297	17.6236	17.8362
	RvDcysK2- 48 h	79.3105	81.5537	79.8183	20.6895	18.4463	20.1817
	RvDcysM- 48 h	87.074	85.4434	84.2502	12.926	14.5566	15.7498
	Rv- 48 h plus CHP	85.3869	84.9211	85.6228	14.6131	15.0788	14.3772
	RvDcysK2- 48 h plus CHP	82.0883	80.7076	81.5661	17.9118	19.2924	18.4339
	RvDcysM- 48 h plus CHP	86.768	87.9657	88.8522	13.232	12.0343	11.1478
	Fgiure 3f. Source Data: Percentage of mycothiol labelling in Rv, RvΔcysM and RvΔcysK2 with or without CHP treatment
		Unlabelled			Labelled
	Rv- 48 h	62.1648	61.6445	63.4744	37.8352	38.3555	36.5256
	RvDcysK2- 48 h	62.0307	64.3639	62.6008	37.9693	35.6361	37.3992
	RvDcysM- 48 h	69.8974	65.792	69.7665	30.1027	34.208	30.2335
	Rv- 48 h plus CHP	65.5909	65.3208	65.3598	34.4091	34.6792	34.6402
	RvDcysK2- 48 h plus CHP	65.0476	64.862	65.5555	34.9524	35.138	34.4445
	RvDcysM- 48 h plus CHP	71.2181	72.9422	71.8325	28.7819	27.0578	28.1675
	Fgiure 3g. Source Data: Percentage of mycothione labelling in Rv, RvΔcysM and RvΔcysK2 with or without CHP treatment
		Unlabelled			Labelled (M+2)			Labelled (M+4)
	Rv- 48 h	31.1261	30.5631	32.0344	50.5425	50.2725	49.959	18.3315	19.1644	18.0066
	RvDcysK2- 48 h	32.4659	34.5068	34.2567	46.4064	47.3189	45.3015	21.1276	18.1744	20.4418
	RvDcysM- 48 h	41.2908	35.0027	37.9754	45.3158	50.727	46.2528	13.3935	14.2703	15.7718
	Rv- 48 h plus CHP	33.9993	34.7764	37.5676	49.1616	47.1556	41.8469	16.8391	18.068	20.5856
	RvDcysK2- 48 h plus CHP	34.8894	35.1305	37.1227	46.1618	46.2552	45.9423	18.9488	18.6143	16.9349
	RvDcysM- 48 h plus CHP	41.7672	40.3962	41.1981	43.6356	47.599	45.402	14.5971	12.0048	13.3999
