# Supplementary material for: Divergent downstream biosynthetic pathways are supported by L-cysteine synthases of Mycobacterium tuberculosis
Source: eLife. 2024 Aug 29;12:RP91970. doi: 10.7554/eLife.91970 (PMC11361707; doi:10.7554/eLife.91970)
Supplement: Figure 4—source data 1. [file elife-91970-fig4-data1.xlsx]

## Sheet: Sheet1
	Figure 4-Source Data 1
	Figure 4b. Source data: Intracellular bacillary survival in peritoneal macrophages isolated from C57BL/6 mice treated with IFNg
		Rv			RvΔcysM			RvΔcysM::M			RvΔcysK2			RvΔcysK2::K2
	+IFN gamma	41000	33000	42000	1200	3800	1850	58000	43000	49000	6000	6100	4200	51000	51000	47000
	Figure 4c. Source data:Intracellular bacillary survival in peritoneal macrophages isolated from C57BL/6 mice in absence and presence of L-cysteine
		Rv			RvΔcysM			RvDcysM::M			RvDcysK2			RvΔcysK2::K2
	Control	43000	42000	38000	2800	4000	2800	38000	43000	52000	6100	6000	5800	49000	33000	36000
	Cysteine	41000	52000	39000	38000	42000	45000	42000	41000	47000	42000	50000	38000	42000	39000	46000
	Figure 4d. Source data:Intracellular bacillary survival in peritoneal macrophages enumerated at 96 h post infection
		Rv			RvΔcysM			RvΔcysM::M			RvΔcysK2			RvΔcysK2::K2
	Control	54000	50000	48000	1500	1300	1700	51000	57000	52000	3500	2200	2900	50000	53000	50000
	Phox-/-	100000	94000	95000	60000	54000	64000	102000	80000	90000	63000	50000	74000	90000	81000	90000
	Figure 4e: Source data: Intracellular bacillary survival in peritoneal macrophages enumerated at 96 h post infection
		Rv			RvΔcysM			RvΔcysM::M			RvΔcysK2			RvΔcysK2::K2
	Control	49000	33000	53000	2000	1000	800	55000	52000	33000	2800	1800	4200	42000	53000	31000
	Ifng-/-	60000	84000	54000	80000	46000	87000	93000	37000	55000	43000	12000	55000	74000	25000	52000
	Figure 4f: Source dataIntracellular bacillary survival in peritoneal macrophages enumerated at 96 h post infection
		Rv			RvΔcysM			RvΔcysM::M			RvΔcysK2			RvΔcysK2::K2
	Control	37000	35000	40000	1200	1500	1400	45000	43000	40000	3200	4000	2800	49000	33000	41000
	Phox	85000	86000	92000	45000	40000	55000	88000	91000	70000	35000	45000	51000	80000	81000	63000
	NO-I	23000	22000	19000	5000	7000	6000	30000	35000	25000	12000	10000	10000	30000	30000	27000
	Phox-NO-I	90000	92000	86000	90000	87000	73000	98000	88000	90000	90000	89000	100000	90000	80000	90000
