# Supplementary material for: Divergent downstream biosynthetic pathways are supported by L-cysteine synthases of Mycobacterium tuberculosis
Source: eLife. 2024 Aug 29;12:RP91970. doi: 10.7554/eLife.91970 (PMC11361707; doi:10.7554/eLife.91970)
Supplement: Figure 5—source data 1. [file elife-91970-fig5-data1.xlsx]

## Sheet: Sheet1
	Figure 5-Source Data 1
	Figure 5b: Source Data: Lung bacterial burden in C57BL/6 mice infected with Rv, RvΔcysM, or RvΔcysM::cysM strains.
	Day 0				Week 4				Week 8
	Rv	RvΔcysM	RvΔcysM::M		Rv	RvΔcysM	RvΔcysM::M		Rv	RvΔcysM	RvΔcysM::M
	100	100	100		160000	2000	137000		720000	12000	220000
	90	110	100		80000	4000	54000		700000	10000	220000
					65000	5200	49000		680000	5000	320000
					56000	6000	65000		470000	12000	490000
					72000	7000	67000		440000	20000	340000
	Figure 5c: Source Data: Spleen bacterial burden in C57BL/6 mice infected with Rv, RvΔcysM, or RvΔcysM::cysM strains.
	Week 4							Week 8
	Rv	RvΔcysM	RvΔcysM::M					Rv	RvΔcysM	RvΔcysM::M
	52000	900	18000					42000	1000	12000
	36000	900	49000					66000	1200	43000
	16000	860	32000					46000	760	12000
	31000	990	32700					54000	750	32000
	44000	500	13200					34000	850	13200
	Figure 5e: Source Data: Lung bacterial burden in C57BL/6 mice infected with Rv, RvΔcysK2, or RvΔcysK2::cysK2 strains.
	Day 0				Week 4				Week 8
	Rv	RvΔcysK2	RvΔcysK2::K2		Rv	RvΔcysK2	RvΔcysK2::K2		Rv	RvΔcysK2	RvΔcysK2::K2
	100	90	100		260000	3000	62000		520000	10000	340000
	100	110	100		180000	1800	64000		440000	5000	420000
					55000	2200	54000		370000	5000	420000
					55000	3000	55000		440000	7000	360000
					60000	3000	37000		380000	2000	340000
	Figure 5f: Source Data: Spleen bacterial burden in C57BL/6 mice infected with Rv, RvΔcysK2, or RvΔcysK2::cysK2 strains.
	Week 4							Week 8
	Rv	RvΔcysK2	RvΔcysK2::K2					Rv	RvΔcysK2	RvΔcysK2::K2
	52000	900	18000					42000	1000	12000
	36000	900	49000					66000	1200	43000
	16000	860	32000					46000	760	12000
	31000	990	32700					54000	750	32000
	44000	500	13200					34000	850	13200
	Figure 5h. Source Data: Lung bacterial burden in C57BL/6, phox−/−, and IFNγ−/− infected with Rv, RvΔcysM, or RvΔcysM::cysM strains.
	C57BL/6				phox−/−				IFNγ−/−
	Rv	RvΔcysM	RvΔcysM::M		Rv	RvΔcysM	RvΔcysM::M		Rv	RvΔcysM	RvΔcysM::M
	60000	5000	47000		220000	35000	137000		220000	120000	210000
	60000	7000	55000		170000	40000	54000		250000	100000	190000
	55000	6200	69000		180000	62000	49000		250000	100000	300000
	50000	7000	55000		150000	50000	65000		400000	200000	400000
	42000	4000	50000		270000	60000	67000		330000	100000	350000
	Figure 5i. Source Data: spleen bacterial burden in C57BL/6, phox−/−, and IFNγ−/− infected with Rv, RvΔcysM, or RvΔcysM::cysM strains.
	C57BL/6				phox−/−				IFNγ−/−
	Rv	RvΔcysM	RvΔcysM::M		Rv	RvΔcysM	RvΔcysM::M		Rv	RvΔcysM	RvΔcysM::M
	5000	600	4300		20000	9000	11700		15000	10000	29000
	5500	700	4500		15000	12000	12400		25000	20000	30000
	5000	820	8000		20000	11500	13900		25000	16000	30000
	4300	500	6500		18000	7000	14600		20000	18000	25000
	4000	500	5500		30000	8000	27000		30000	10000	35000
