# Supplementary material for: Divergent downstream biosynthetic pathways are supported by L-cysteine synthases of Mycobacterium tuberculosis
Source: eLife. 2024 Aug 29;12:RP91970. doi: 10.7554/eLife.91970 (PMC11361707; doi:10.7554/eLife.91970)
Supplement: Figure 6—source data 1. [file elife-91970-fig6-data1.xlsx]

## Sheet: Sheet1
	Figure 6: Source Data: Effect of C1, C2, and C3 on Mycobacterium tuberculosis-infected Peritoneal Macrophages
	Rv			C1			C2			C4
	200000	180000	200000	18700	17500	20000	26200	27500	32500	58000	52000	59000
